# Supplementary material for: How real-world evidence can really deliver: a case study of data source development and use
Source: PubMed Central journal article supplement — BMJ Surg Interv Health Technol. 2020 Mar 24;2(1):e000024. doi: 10.1136/bmjsit-2019-000024 (PMC8749311; doi:10.1136/bmjsit-2019-000024), 2020-03-24

eFigure 2: UDI Scan Compliance

## UDI Scan Compliance by Time of Day

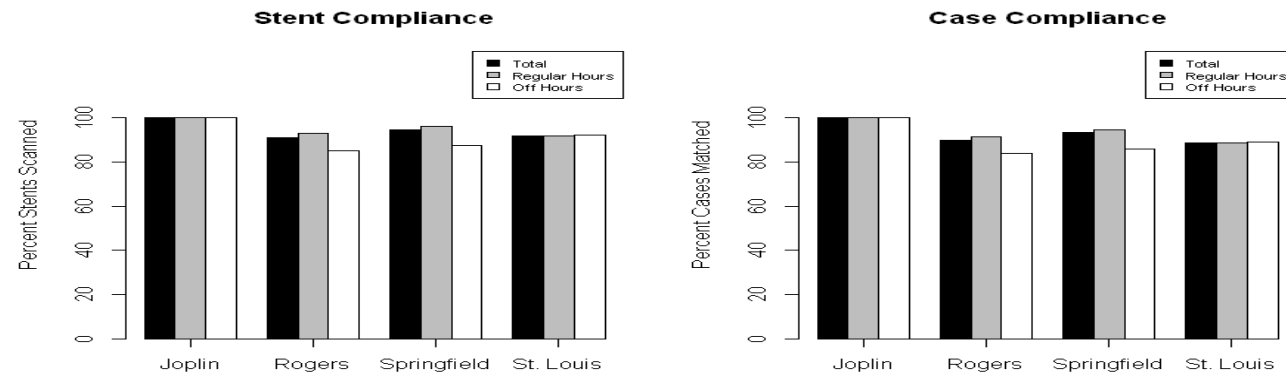

## UDI Scan Compliance by Procedure Type

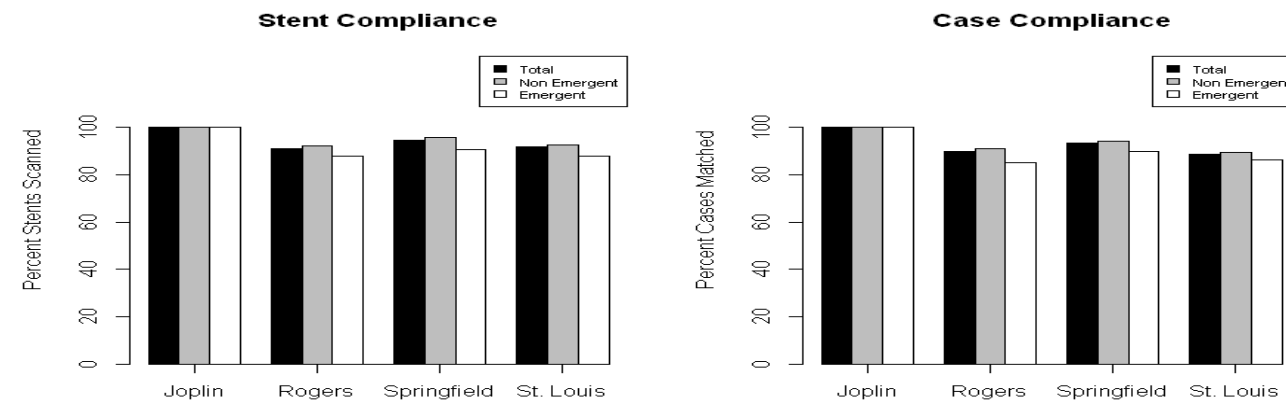

Supplement: bmjsit-2019-000024supp003.pdf [file bmjsit-2019-000024supp003.pdf]
